# Supplementary material for: Treatment of Atrophic Rhinitis with Manuka Honey–a non-randomized control trial, and a new theory of etiopathogenesis for the disease.
Source: Research Square preprint supplement (doi:10.21203/rs.3.rs-137101/v1), 2021-01-08
Supplement: Supplementary file 1 [file 7e61799a87868fe9a5e03d23.docx]

| Sl. No | Symptom | Number of patients who presented with and percentage of the total number |
| --- | --- | --- |
| 1 | Nasal Obstruction | 19 (100%) |
| 2 | Foul Smell | 15 (78.94%) |
| 3 | Impaired smell sensation | 9 (47.36%) |
| 4 | Nasal crust | 17 (89.47%) |
| 5 | Nasal discharge | 12 (63.16%) |
| 6 | Maggots | 1 (5.26%) |
| 7 | Epiphora | 1 (5.26%) |
| 8 | Epistaxis | 3 (15.79%) |
| 9 | Headache | 5 (26.31%) |

Table 1. The list of symptoms the patients presented with and the number of patients having a symptom at presentation.

| **Endoscopic feature** | **Cases** | | | | **Controls** | | | | **Cases Vs Control pre-treatment score** | | **Cases Vs Control post treatment score** | |
| --- | --- | --- | --- | --- | --- | --- | --- | --- | --- | --- | --- | --- |
|  | **Pre treatment** | **Post treatment** | **MD**  **95% CI** | **P value** | **Pre treatment** | **Post treatment** | **MD & 95% CI** | **P value** | **MD** | **P value** | **MD** | **P value** |
| Crusts | 1.84 ±0.38 | 0.21±0.42 | 1.63  SE: 0.13  CI: 1.37 to 1.89 | .0001 | 1.73± 0.45 | 1.63±0.49 | 0.1  SE: 0.15  CI: -0.21 to 0.41 | 0.52 | 0.11  SE: 0.14  CI: -0.16 to 0.38 | 0.419 | 1.5  SE: 0.05  CI: -1.43 to 1.62 | 0.0001 |
| Nasal cavity roominess | 1.42  ±0.507 | 1.37  ±0.496 | 0.05  SE: 0.163  CI:  -0.28 to 0.38 | 0.764 | 1.47  ±0.513 | 1.47  ±0.513 | 0  SE: 0.166  CI –  -0.39 – 0.34 | 1 | 0.050  SE: 0.165  CI: -0.3 to 0.39 | 0.764 | 0.050  SE - 0.053  CI:  -0.06 to 0.16 | 0.35 |
| Atrophic turbinates | 0.26  ±0.45 | 0.21  ±0.42 | 0.052  SE – 0.14  CI:  -0.24 to 0.34 | 0.71 | 0.32  ±0.48 | 0.32±0.48 | 0  SE: 0.16  CI: -0.32 to 0.32 | 1 | 0.05  SE: 0.151  CI: -0.25 to 0.36 | 0.73 | 0.05  SE: 0.05  CI:  -0.05 to 0.15 | 0.28 |
| Nasal Mucosa congestion | 1.68  ±0.48 | 1.05  ±0.23 | 0.630  SE: 0.12  CI: 0.38 to 0.88 | 0.0001 | 1.73  ±0.45 | 1.68  ±0.48 | 0.05  SE: 0.15  CI:  -0.26 to 0.36 | 0.743 | 0.05  SE: 0.15  CI: -0.26 to 0.36 | 0.74 | 0.58  SE: 0.05  CI:  0.48 to 0.67 | 0.0001 |
| Nasal Discharge | 1.05  ±0.91 | 0.16  ±0.37 | 0.89  SE: 0.23  CI:0.44 to 1.35 | 0.003 | 1.05  ±0.91 | 1  ±0.88 | 0.05  SE: 0.291  CI:  -0.54 to 0.64 | 0.865 | 0  SE: 0.29  CI: -0.59 to 0.59 | 1 | 0.843  SE: 0.09  CI: 0.67 to 1.01 | 0.0001 |

Table 2. The endoscopic scores pre-treatment and post treatment, with comparison in between the test (right) side and control (left) side pre-treatment and post treatment.

|  | Improved | Not Improved | P Value |
| --- | --- | --- | --- |
| ***Nasal obstruction (n-19)*** | | | |
| Right | 18 | 1 | 0.003 |
| Left | 9 | 10 |
| ***Foul smell (n-15)*** | | | |
| Right | 9 | 6 | 0.06 |
| Left | 3 | 12 |
| ***Impaired smell sensation (n-9)*** | | | |
| Right | 6 | 3 | 0.637 |
| Left | 4 | 5 |
| ***Crusts (n-17)*** | | | |
| Right | 16 | 1 | 0.00001 |
| Left | 2 | 15 |
| ***Nasal Discharge (n-12)*** | | | |
| Right | 12 | 0 | 0.0013 |
| Left | 4 | 8 |
| ***Epistaxis (n-3)*** | | | |
| Right | 3 | 0 | 0.4 |
| Left | 1 | 2 |
| ***Headache (n-5)*** | | | |
| Right | 1 | 4 | 1 |
| Left | 1 | 4 |

Table 3. Table showing degree of improvement in symptoms in the test and control sides of the nasal cavity pre and post intervention, and their statistical significance using Fischer’s exact test.

|  | **Test/Case side (Right)** | | | | **Control side (left side)** | | | | **Cases Vs Control**  **Pre treatment** | | **Cases Vs Control**  **Post treatment** | |
| --- | --- | --- | --- | --- | --- | --- | --- | --- | --- | --- | --- | --- |
|  | **Pre treatment** | **Post treatment** | **MD**  **95% CI** | **P value** | **Pre treatment** | **Post treatment** | **MD & 95% CI** | **P value** | **MD** | **P value** | **MD** | **P value** |
| **Cumulative symptom score** | 4.32  ±1.92 | 0.84  ±1.13 | 3.47  SE: 0.51  CI:  2.4 to 4.5 | 0.0001 | 4.26  ±1.88 | 3.47  ±2.01 | 0.79  SE: 0.63  CI: 0.49 to 2.07 | 0.22 | 0.053  SE: 0.66  CI: 1.19 to 1.3 | 0.93 | 2.685  SE: 0.18  CI:  2.3 to 3.06 | 0.0001 |

Table 4. The cumulative symptom score for pre and post treatment of right and left side of nose the test and the control side

|  | **Improved** | **Not Improved** | **P Value** |
| --- | --- | --- | --- |
| ***Basement membrane thinning*** | | | |
| Right (19) | 7 | 12 | 0.12 |
| Left (19) | 2 | 17 |
| ***Granulation tissue*** | | | |
| Right (15) | 14 | 1 | 0.005 |
| Left (19) | 2 | 17 |
| ***Fibrosis*** | | | |
| Right (9) | 7 | 2 | 0.13 |
| Left (7) | 2 | 5 |
| ***Mucus glands*** | | | |
| Right (19) | 15 | 4 | 0.0001 |
| Left (19) | 1 | 18 |
|  |  |  |  |
| ***Bacterial colonies*** | | | |
| Right (17) | 15 | 2 | 0.01 |
| Left (17) | 7 | 10 |

Table 5. Table showing improvement in pathological features in the test and control sides of the nasal cavity pre and post intervention, and their statistical significance using Fischer’s exact test.

|  | Right nasal cavity | | | Left nasal cavity | | | Right Pre-treatment vs Left Pre-treatment | Improvement in right Vs improvement in left |
| --- | --- | --- | --- | --- | --- | --- | --- | --- |
|  | Pre-treatment | Post- treatment | P value | Pre-treatment | Post- treatment | P value | P value | P value |
| Median | 0 | 15 | 0.001 | 1 | 1 | 0.32 | 0.16 | 0.001 |
| IQR | 0 | 0-2 | 0-2 | 0-2 |

Table 6. The median and interquartile range of glandular hypertrophy – a pathological feature, pre and post treatment being compared between right(test) side and left(control) side.
